# Supplementary material for: Rifampicin has no role in treatment of Mycobacterium avium complex pulmonary disease and bactericidal sterilising drugs are needed: a viewpoint
Source: PubMed Central journal article supplement — Eur Respir J. 2024 May 2;63(5):2302210. doi: 10.1183/13993003.02210-2023 (PMC11063616; doi:10.1183/13993003.02210-2023), 2024-05-02

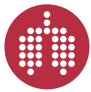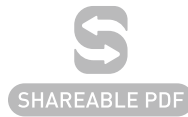

# Rifampicin has no role in treatment of *Mycobacterium avium* complex pulmonary disease and bactericidal sterilising drugs are needed: a viewpoint

Jakko van Ingen <sup>1</sup>, Wouter Hoefsloot <sup>2</sup>, Véronique Dartois<sup>3,4</sup> and Thomas Dick<sup>3,4,5</sup>

<sup>1</sup>Department of Medical Microbiology, Radboud University Medical Center, Nijmegen, The Netherlands. <sup>2</sup>Department of Pulmonary Diseases, Radboud University Medical Center, Nijmegen, The Netherlands. <sup>3</sup>Center for Discovery and Innovation, Hackensack Meridian Health, Nutley, NJ, USA. <sup>4</sup>Department of Medical Sciences, Hackensack Meridian School of Medicine, Nutley, NJ, USA. <sup>5</sup>Department of Microbiology and Immunology, Georgetown University, Washington, DC, USA.

Corresponding author: Jakko van Ingen ([jakko.vaningen@radboudumc.nl](mailto:jakko.vaningen@radboudumc.nl))

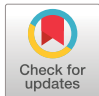

Shareable abstract (@ERSpublications)

Rifampicin is used for the treatment of *Mycobacterium avium* complex pulmonary disease, but pharmacokinetic and pharmacodynamic studies suggest that rifampicin cannot have therapeutic utility. We need to find better alternatives, using PK-PD science. <https://bit.ly/3PUGvbV>

**Cite this article as:** van Ingen J, Hoefsloot W, Dartois V, *et al.* Rifampicin has no role in treatment of *Mycobacterium avium* complex pulmonary disease and bactericidal sterilising drugs are needed: a viewpoint. *Eur Respir J* 2024; 63: 2302210 [DOI: 10.1183/13993003.02210-2023].

This extracted version can be shared freely online.

Copyright ©The authors 2024.

This version is distributed under the terms of the Creative Commons Attribution Non-Commercial Licence 4.0. For commercial reproduction rights and permissions contact [permissions@ersnet.org](mailto:permissions@ersnet.org)

Received: 10 Dec 2023  
Accepted: 2 April 2024

Current rifampicin/ethambutol/azithromycin regimens for the treatment of *Mycobacterium avium* complex pulmonary disease (MAC-PD) are long, toxic and yield relatively poor outcomes [1]: a meta-analysis lumping nodular bronchiectatic disease and fibro-cavitary disease reported a 65% prolonged culture conversion rate; following initially successful treatment, recurrence rates of 30% have been reported [2].

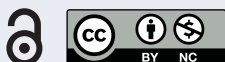

Supplement: ERJ-02210-2023.Shareable.pdf [file ERJ-02210-2023.Shareable.pdf]
